# Supplementary material for: CRISPR-Cas13d screens identify KILR, a breast cancer risk-associated lncRNA that regulates DNA replication and repair
Source: Springer Nature journal article supplement (doi:10.1186/s12943-024-02021-y), 2024-05-15
Supplement: MOESM1 [file 27095352]

**Supplemental File 1. KILR sequence (5' to 3')**

TTTTTTTTTTTTTTTTTTTTTTTTTTTTTTTTTTTTAGATCTTGCCTCCAAAGTAGAGCTTGGGGACTGTTGTCTAATCCAAACCACCAGG  
GGAAATGCCAGTTGTGTGGGCTGTGACTTTGGGATGAGACCGCAGAGCCTGTAGAATCAAGTTGAACCTCAAAGT  
GCCAGCCTTGTGGATTTTCGGCCACAGGCTGCTCCAGCAGAATGTTTCATGCAGATGCTCTTTGAACAACTCCCT  
CCTCAAACCTGCAAATTCAGCCTTCCCAAATGGATTTGTCAAGTTGGAAATCTCTTATATATACCCATCCTCACCC  
TTCGTAGGCAGAAGCAATTCTAGAGCTGTCTTCTCAGCGAATTGTTAACCAACTCAGAGCCTGGTGGTGTACCGG  
GAGTGGCAAGTTCTGTGAGTTTATTTTCAGGACAGCCAGAAGGTGTTTCGGTGGAACTGGTCCCCTGCCTCTGCAGT  
GCAGGTGTGGCCTGGTGGGGTGGGAAGTGCAGCCAGGGAAAACACAGGGCAGAAGCCTGGGCAGAACTGTCCT  
TATGGAATCTGACTTTCCCTACTCCCTACCCAGGTACAGATACAGTGTAGGATCCTTGGACAGACCATGAAACC  
TGGAGAATTGGAATTTCAAGAAGAAAATGGTTTAAAATGCCATAATCTTGCATTGAATTAATTGAAGAGGAAACA  
ATATTTGATTACAGCTATCTGATAACACTTCAAATGGCAAGCCATTAGATTCAACTCAGTTCAACAACTGGTC  
CCTACTGTGTGCTAGGGTCTGTGTTAGGCACTGAACATAATGCCTGGATACAATGAATCCCATAGGGTTTCAGCTT  
CTACCAAGACAAGAAAGTTATCTTGGGGGGGAAAAAAAAAGTAAAAAGTACTTGTCAAAGAAACACATTTTTCTCT  
AAACAAACTTAACATCATAAATCTGGAGAGAAAAATATCCAGTAATAATATACTCTCTGAATGGAAAATTCCCA  
CAATAATAACAAAAATAACAATGATCTGTATACTTAGTACAGCTCTATTTTTGCTTTTCATCTAATGATTTCAA  
GAGTTTAGCAACCACTGCTGAGCTAATCCTTAGTACTAACTTGACTCTTCCATCCTTCTTTGAAAAAAAAAAAA  
AAATTGGCACTAACTCCTCAACATCCACAGGGAAGAAGTCTGGAAACAAAGCATGGCTCACTCCACACAAGC  
ATCAAGCAGCAAATTAAGACAGTCTAATTCATCCAGAAAAGTAAGTTGGGACCCAGAAGAATCAAATGAATGCC  
CACAAAATGAAAGTCATTTGAAAAAGAAAGACAAGTTTCTTCTTGCAGGTGAAAAGGAAAAACTTTTTCAATGTA  
CCATTGGGCATTTCTTGATGGGTTTATATCTCTCAGAGATGTAAGTTCCAGAGTATACTCTGGGAAGGCTTTCATT  
TTCAAAGACAGAATTTAAATCCTGTTTTAAAAACAGAAAGGGAGATAAAGATTTTCAATTTCCATAACATGGTATGT  
AAAGACAACCTTGATTCAGCTGATGATCTCCAAGCTCTTTGATGAATCCCCCAGAACACATCCATGTAAAGGGA  
AAGGTTATGAATGAAAGAATTCAATTGTTTTGCAAAAATAAAGGGAGACTCTGCCAGAGATAGAGATGATCTGGAA  
CAGAACTGGTCCCTAATTACACAGTAATCTGACACCTTAGCACTCTCATCCTGCAGTCTTCACCTTCAAAGGATC  
TTCCCAATATTAATGAATTTCTTCACCTCCTTTTCTCTCATCTTATCCATAATAGCTACTCTTTAAAGAAAAGTTG  
GTCAACTTTTTAGAAAGACTTGACTAACATTATCATTTTTAGCCTAGGATTTAGTCACAAGTATCTCTTTCCTTTTG  
ATGCTTTGTGGTGTTTTCTTTTGCCTGGTTTTTGAATACATATTGCAGGCTGTGTTTTATGACCCTTTGATTTTTTT  
TTTTTTTTCTTGAGACAGAGTTTGGTTCTTGTGTTGCCAGGCTGGAGTGCAATGGCACAGTCTCAGCTCACTAAAA  
CCTCTGCCTCCCGGTTCAAGCGATTCTCCTGCCTCGGCCTCCCGAATAGCTGGAATTACAGGCGTGCATCACC  
TGCCCGAATAATTTTGTATTTTTAGTGGAGACAGGGTTTTACCATGTGCATCAGGCTGGTCTTGAACCTCTGACC  
TCAGGTGATCCACTCACCTCAGCCTCCCAAATGCTGGGATTACAGGCATGAGTCACTGTGCCTGGCCTGAAACT  
GTTATTACACACACACATACACACACGGCAGCCTTGTGGGAAGATATTATAATAAAAATAATATAGAAGTATTAC  
CATAGGACAAAAGATCAGAGATGGCTTTCTAAAAGCCTCAAAGACATGTGTGAGCTGGGTCTAACAGATAACTAG  
GAAGGTGTCAAGTGTGTAAGAGGGGAAAGGCATCCTAGGCAGAGGGGAGCTGTTTGGAGAAAAGGCTGGTGCATGG  
ATGGGAATTGATGGTCCAGGTATAAGGCACACTGAGGTGCAGCTAGAGCCAGGCCTGGGGTATATATTGTGTTA  
ATCAGAATTTGACTGGAAAAGTGACTTGCTCAAGCTTACACAGTCAGAAAGTAGCACTGCTTGATCTCAGTGAGG  
CTATCTGGCTCCAAGTCCATGCTCAGTCTGAGTTAGCATCCAGTCTTCTCCTTGTGCAAAAAATGAATGGATA  
CACGGAGCTTACAGCCAAATGGGTGATACAGGCATGTAATTCACAATTACAATACATGCAAGAAACATCTGTCA  
AATACCTTCTACGTGCCAGTAGCTATGCTAGGCAATGCGAATACAAAAAAAAAAAAAGCCCTCTCTTTGAATGAA  
GCCTAAGGAGTCTGGTTAAGAAGAAAATAGCAGTTACAATACCTGTCCAAAGTGCTGGGGAACCAAAGGAGAAA  
TCTGCCATACAGAGTGAGAGAAGGTGCCTCAGAGGACTTGAGCTAAGACTGGAAGACTCACAATTCAGTGGTTGG  
CACTACCAAGGCAAGATCATGATCATTGCTAACATGAATAAGCACTTAAGAGTATGCCAGGCACTCTTCTAAGCT  
CTTTATCCATATTAACTCATTTAGTCCCTCACACAATCCCTATTCTACAAACAAAAGGTGAAAGATTTTGGCC  
AAGATCACACAACACATAAGTGGCAGTGCCAGAATTTGAATCCAAGTTGTTTGGTGGCAGAGCCATACACTCGC  
CACTATACTACATTTCTTGTCTTTCACAGAGAGGGAAGCCAGGCCTGCTGAAGTCAGGGAATGTTTCCAAGAGG  
AGGTAACATGTGAAATCATTTCAAAGATCTCTGGGAGTTGAGTTGTTGAGCCAGGAGACGAAGAGTATGGCCA  
AGGGCATAAGAGTCAAGGTAGGATGAGAGACAAGTGTTTTCAAGGAAGAGCAATTACTTCTGGTAGCTGGAGGG  
TGAGGCTGGTTTTTGGAGAATGGTGGACCCCTGTAAAGGAGTAGGCAGGGAGTACGTTATAGTTTTGGTTTTGTTGGT

TTTCAGGGGAAGACAAACTTATACCAATAGTCTAAGTTAAAGGATACAAAGGACCAGGGATCAGAGACTAAACTCA  
GCCTGGACACGTTTGCAGGCTGCCACTCTCCTGTGGGTGGTGTGCCTCCAGTTTACCTTCTACTTTGTTTGC  
TGCATCACTGAACAGCAGAAGTGGCCTGAATTAGTGTGATGCCATTGGAAGTGGAGAGCATGGGCTGAATGGAAT  
GGATTTGACATAAAGGAGAGGAAGCAGGGAAAGGGGACTACAGAGTTCTAGCTCGGGTGCATTGCAGAGATGGGA  
AATAAAGCAGGAGGAGCAGATTTGGATGGTGTTCGGACGGAAGTGTGTTCTCCAAATTCATATGCTGAAGCG  
CTAACCTGCAGTGTGACTCTATTTGGAGATAGGGTGTAAAGAGGTAATTAAGGTTAAACAAGGGCATAAGGG  
TGGGCCCTAATCTGGTAGAACTGATGTGTTTATAAGAAGAGAGATGCCAGAGAGCCCTCTCTCTCCAGGCTCT  
CACACAGAGAAGAGGTCATCTACAACCAGGAAAAGAGGCCTCAACAGAAACCAACCCTGCTGACACCTTAATCTT  
GGACTTCCAGCCTCCAGAAGTGTGAGAAAATTAATTTCTGTTGTTTAAAGCCACCCAGTCTATAGTATTTTGTAA  
TAGTACCCCAAGCCGATTAATACAAAAGAAAAGACTATTATCAGCCTTTGGATGAAGACATAATAGATGGATTTT  
AAAACAAATCTTGAGGCCGGGTGCAGTGGCGCATGCCTGTAATCCCAACACCTTGGGAGGCTGAGGTGGGAATAT  
CACTTAAGCCAGGAGTTCAAGACCAGCCAGGCAACATAGGGAGAACCCCGCCCCCACCACCCCAACCCCA  
CCGGGCTTACACACAAAAAATAAAAATTAGCCGAGCATGGTGTGTTGCCGTAATTCAGCTGCTTGGGAGA  
CTGAGGTAGGAAAGTCACTTGAGCCTGGGAGGTCAAGGCTGCAGTGTGAGCTGAGATGGCACCCTGGAGGCCAGCC  
TGGGTAGCCCTATCTCAAAAACAAACAAACAAATCTTGAGACACAATTGGCAGGGCTTGGTGCTTCAAGTGAAGT  
GGAGCCTGAGAAAGAGTGAAGAAGGAGATGGGATATTGTCCAGGTTTCAAGTATGGATACAGGGTGAATTTGGT  
GCCTTTCCCTGAGTCAAGATTTGGGAGGTGCACCTGGGCGGAGGGCGAAGGCATAGTTAGGATTTCTTGGTTGT  
AAGCAAGATAAATTTAAGACAGGGCTGATTAACATATAGGGATGTAGTGTGAGACTAAAAGGGAAGTGAACCTCATT  
CAAACCCAACATCAGCACTCTAGGAGAGTGTGACTCCTTGGAGGCCAGACTAGACGGTGGGTCTGGATACAGAGC  
AGCCCCAGGCCCTCAGCAGGTGCTCACGCCAGCACGGGACTGGGCTGATTCCATGGCCCTGCCCTTTCTTCTA  
ACTACTGACTACTCTGACCCTGATTCCTAGAGAAAGAGAGACTGTTTGGCTCAGGAGTTTCAATCCAGCCTTCTA  
GTTAGCCCAGGGATTAGCTGCCAGGGACCCATCCTTGGGCACATCCCTTATAGTTGCTGGTCATGTGACAGACC  
ACTTGGCTTGACAAATCTGTCCCTTCATCAGTGGCTGTGAGCAAGTCAGCATCCTTAGAAAGGTCTGAGGTATGT  
CAGGCACTGTAATAGAAACACCTAGAACAGAAGGTGGGCGTGGTAAGAAGACCATTGTGTGGTTTTAGGCTTAT  
TGGGTTTTGGAGGATCTGCTTGACATGCAAGCAGAGAGACCCAGAACATATCTACAATAGGCACCTGGAGACAT  
GGGCCACTCAACAGAGCAATGAAGGCCATGGAGACAGATTTAGAGATGACAGCACATGGACGGACCCAATTCCT  
ATTAATAAGCAATAAAGGGACACATACTCATGTTGCAAAATTCAAACAACACCAAGCATGGAGAATAAGAAGT  
TAAAGTTCCCTCAATGCTACTCTCTTCTCCAAAGTCAACACTGTAAATGATTTTATGTGTTTTCTTTTTACTCCA  
CTGCAGTTACATTTGTAATAATGTATGTATCATTTTAGGTCAGAGTTTTTTTTTTTTCAGCAAATGGGCTTATAC  
TTTTCATTAATTTTTTTTACTTGCTTAATAAAATGTCTTGGAGACCACTGCACTCAGCACTTACAAACCTACATTA  
TTCTTTATATCTATAGATAGTGTCTGTTGAATAGATGAGATATAATTTATTTATTACCATCTGCCTCTGAAGT  
TAGATTGTATCCAATGATTCTTTATTATAACAATGCTTCAAGAGCACCCCTGTACATATATCTTTGTGTGCAGC  
CCATTTCTAGAAATGATTTACTGCGTTGAAAGGGATGTGCATTTTCCCACTGTCCTCTAAAAAGACTGTACCATT  
TACCCTTCTAGCAATGATAGAGGATGCACATGCTTATTGCTCTACACCCACGTGGTTGTTTCTTAAACCATTTTG  
CATCAGACTCCTTTAAGATGTTGAAAGCTATGGATTTAATTCAGAAAAATACACAGATGTACATATACAGAAC  
ATTTTGCATACAATTTCTGCAGGTTACACAGACAACCTAAACACACCCCAGAACACACCCCTCCCCACCCCTGCC  
AGACCTGAATAGACATGTGTGAATGGGTGCCAGTCTAAGGGCAGTGGGTCCCAATCTTAGTTGCACATTAGAATC  
ACCTGCAGGACTTTGAAAAGTCCCCATGCCAGGCCACTTCCAGACCTATCGATCTGGTTCTTTTGGAAAAGGA  
TCTGGGTATCAGTATTTTTTGAAGTTCTCCAGGTGATATTAACATGCAGCCAATCGCAGGAACCACTGCAGTCT  
AGGAGAGGCCTGAAGAAGGATTAATAAAGAAATTAATAACAGAAAACCAGAGTGTACAAGGGGCTCTTGGGGGCT  
CACACGTGGCTGGAGGAGCTTTTATTTTAAACAATCTGGGGTGGGATCTGGCATTGATACATATTTTTTGTGTG  
AGAATGTTTGTGCATACACAAAAGTAGAGAGAATGAACACCCATGTAACCTATATTAATAACTTTAAAAAAA
