# Supplementary material for: CRISPR-Cas13d screens identify KILR, a breast cancer risk-associated lncRNA that regulates DNA replication and repair
Source: Springer Nature journal article supplement (doi:10.1186/s12943-024-02021-y), 2024-05-15
Supplement: MOESM6 [file 27095352]

**a**

| K5+/K19+       |               |               |               |                |                |                |
|----------------|---------------|---------------|---------------|----------------|----------------|----------------|
|                | Day 0 - Rep 1 | Day 0 - Rep 2 | Day 0 - Rep 2 | Day 21 - Rep 1 | Day 21 - Rep 2 | Day 21 - Rep 3 |
| Day 0 - Rep 1  | NA            | 0.987         | 0.987         | 0.927          | 0.923          | 0.927          |
| Day 0 - Rep 2  | 0.987         | NA            | 0.985         | 0.926          | 0.925          | 0.925          |
| Day 0 - Rep 2  | 0.987         | 0.985         | NA            | 0.927          | 0.924          | 0.927          |
| Day 21 - Rep 1 | 0.927         | 0.926         | 0.927         | NA             | 0.957          | 0.960          |
| Day 21 - Rep 2 | 0.923         | 0.925         | 0.924         | 0.957          | NA             | 0.924          |
| Day 21 - Rep 3 | 0.927         | 0.925         | 0.927         | 0.960          | 0.924          | NA             |

  

| MCF7           |               |               |               |                |                |                |
|----------------|---------------|---------------|---------------|----------------|----------------|----------------|
|                | Day 0 - Rep 1 | Day 0 - Rep 2 | Day 0 - Rep 2 | Day 21 - Rep 1 | Day 21 - Rep 2 | Day 21 - Rep 3 |
| Day 0 - Rep 1  | NA            | 0.992         | 0.991         | 0.908          | 0.892          | 0.901          |
| Day 0 - Rep 2  | 0.992         | NA            | 0.990         | 0.906          | 0.891          | 0.899          |
| Day 0 - Rep 2  | 0.991         | 0.99          | NA            | 0.908          | 0.892          | 0.901          |
| Day 21 - Rep 1 | 0.908         | 0.906         | 0.908         | NA             | 0.932          | 0.945          |
| Day 21 - Rep 2 | 0.892         | 0.891         | 0.892         | 0.932          | NA             | 0.923          |
| Day 21 - Rep 3 | 0.901         | 0.899         | 0.901         | 0.945          | 0.923          | NA             |

  

| MDAMB231       |               |               |               |                |                |                |
|----------------|---------------|---------------|---------------|----------------|----------------|----------------|
|                | Day 0 - Rep 1 | Day 0 - Rep 2 | Day 0 - Rep 2 | Day 21 - Rep 1 | Day 21 - Rep 2 | Day 21 - Rep 3 |
| Day 0 - Rep 1  | NA            | 0.984         | 0.985         | 0.916          | 0.906          | 0.911          |
| Day 0 - Rep 2  | 0.984         | NA            | 0.984         | 0.916          | 0.910          | 0.912          |
| Day 0 - Rep 2  | 0.985         | 0.984         | NA            | 0.915          | 0.906          | 0.912          |
| Day 21 - Rep 1 | 0.916         | 0.916         | 0.915         | NA             | 0.941          | 0.946          |
| Day 21 - Rep 2 | 0.906         | 0.910         | 0.906         | 0.941          | NA             | 0.941          |
| Day 21 - Rep 3 | 0.911         | 0.912         | 0.912         | 0.946          | 0.941          | NA             |

**b**

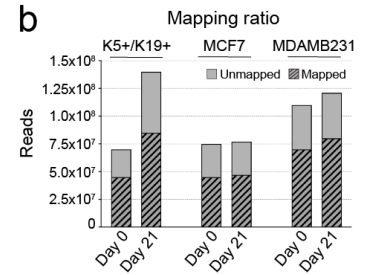

**c**

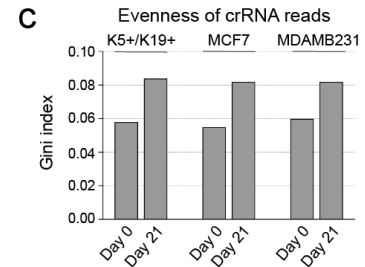

**d**

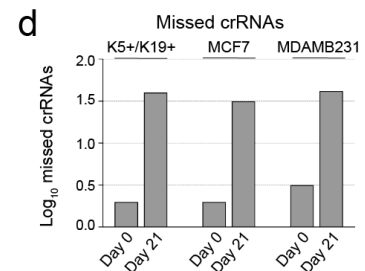

**e**

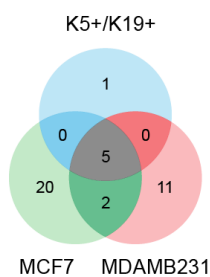

**f**

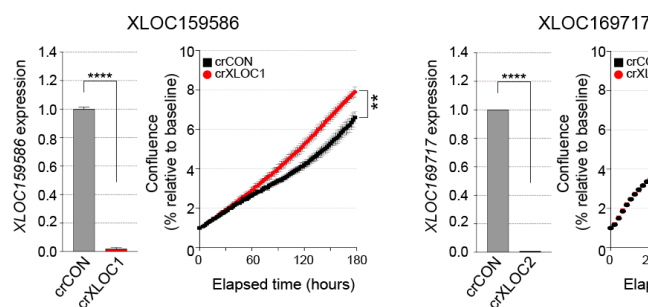

**g**

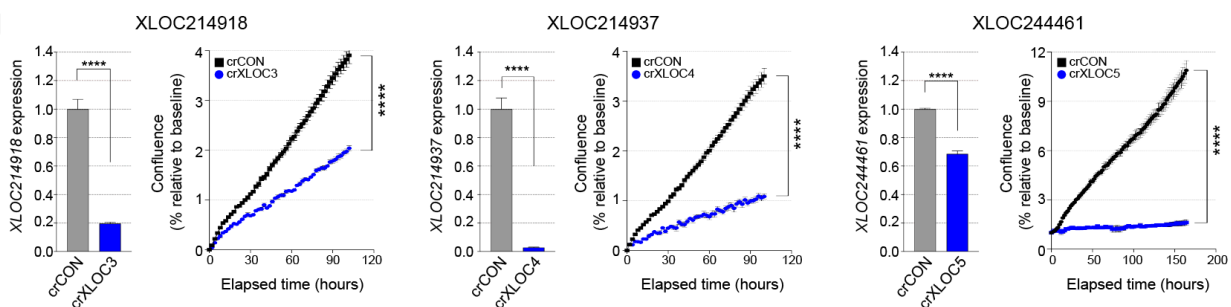

**Supplementary Figure 1.** Quality control assessment of the CRISPR-Cas13d screen data. **(a)** Heatmaps showing pairwise sample correlations between CRISPR-Ca13d biological replicates in K5+/K19+, MCF7 and MDAMB231 breast cell lines. **(b-d)** Graphs generated by performing MAGeCK crRNA counts in each cell line at Day 0 ( $n = 3$ ) and Day 21 ( $n = 3$ ). **(b)** The total number of reads and mapped percentage of crRNAs. **(c)** Gini index measures the evenness of crRNA read depth. **(d)** The number of missed crRNAs. **(e)** Venn diagram of high confidence lncRNA hit counts with  $FDR \leq 0.3$  in three breast cell lines. **(f, g)** qPCR for lncRNA expression (left panels) and cell confluence measured over time using Incucyte (right panels) in MCF7 cells after CRISPR-Cas13d lncRNA knockdown. The crCON contains a non-targeting control. Error bars, SEM ( $n = 3$ ).  $p$  values were determined by Student's  $t$ -test (\*\* $p < 0.01$ , \*\*\*\* $p < 0.0001$ ).

**a** 5'RACE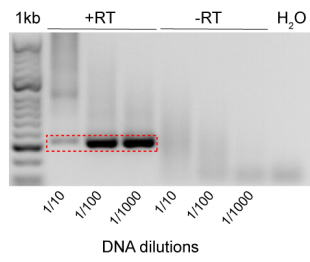**b** 3'RACE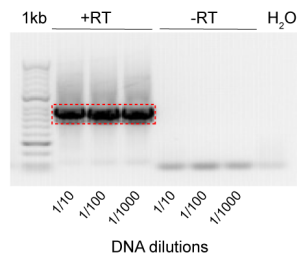**c**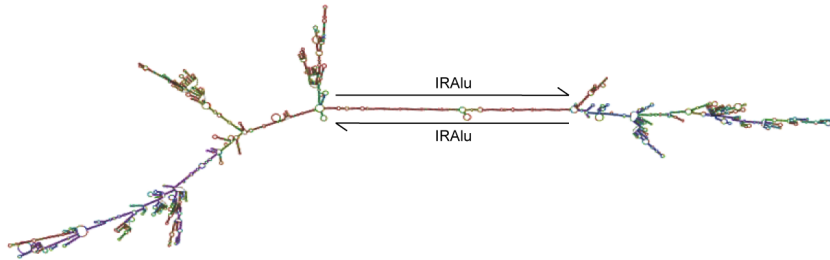**d**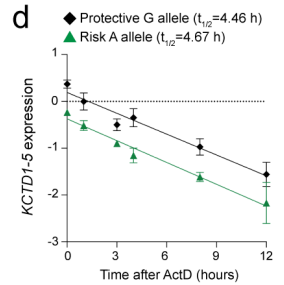**e**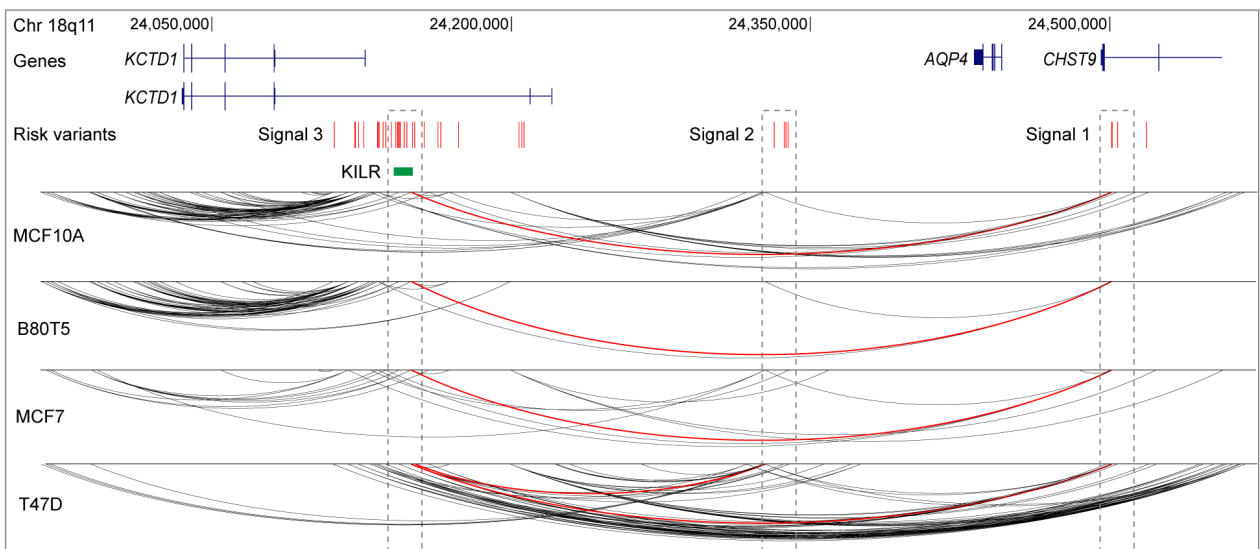**f**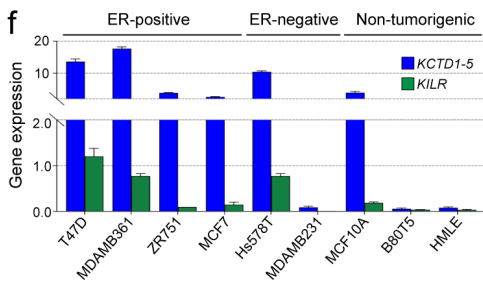**g**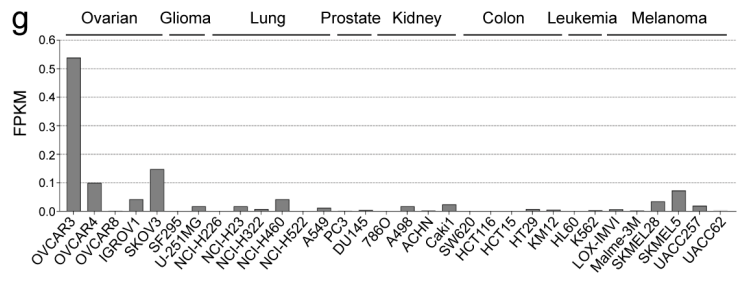**h**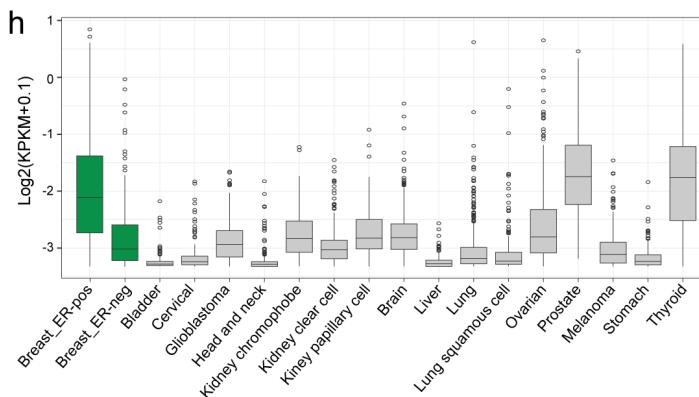**i**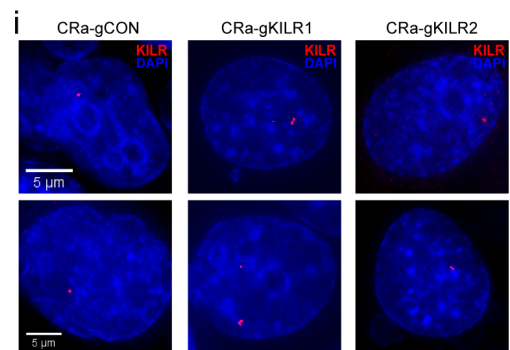

**Supplementary Figure 2.** *KILR* is a large, single exon, breast cancer-associated lncRNA. (a, b) Agarose gels of 5'RACE (a) and 3'RACE (b) PCR products. The dashed red outlines highlight the *KILR* transcript. RT (reverse transcriptase). (c) The predicted secondary structure of *KILR* (RNAfold). The black arrows show the inverted repeat Alu (IRAlu) elements predicted by Dfam [1]. (d) *KCTD1-5* hnRNA stability assay in MDAMB361 cells after treatment with actinomycin D (ActD), then qPCR for *KCTD1-5* hnRNA relative to *CDKN2A* mRNA levels. *KCTD1-5* hnRNA half-life ( $t_{1/2}$ ) was calculated by linear regression analysis. Error bars, SEM (n = 3). (e) WashU genome browser (hg19) showing annotated GENCODE genes (blue) and *KILR* (green). The breast cancer risk variants are shown as red vertical lines (Signals 1-3). Variant capture Hi-C chromatin interactions in breast cell lines are shown as arcs. The dashed gray outlines and red arcs highlight chromatin interactions between risk variants and *KILR* in MCF10A, B80T5, MCF7 and T47D cell lines. (f) qPCR for *KCTD1-5* and *KILR* expression in ER-positive, ER-negative breast cancer and non-tumorigenic breast cell lines. Error bars, SEM (n = 3). (g) Normalized FPKM expression of *KILR* (estimated by LocExpress [2]) from AnnoLnc2 [3] in the Cancer Cell Line Encyclopedia. (h) Boxplot of FPKM expression of *KILR* in The Atlas of Non-coding RNA in Cancer (TANRIC [4]) from TCGA RNA-seq data (6,000 tumor samples from 17 cancers). (i) Additional confocal microscopy images of *KILR* in MCF7 cells after CRISPRa activation of the *KCTD1-5* promoter to overexpress *KILR* with two independent gRNAs (CRa-gKILR1-2) stained with Stellaris *KILR* RNA FISH probes (red). The CRa-gCON contains a non-targeting control. Nuclei were stained with DAPI (blue). Scale bar, 5  $\mu$ m.

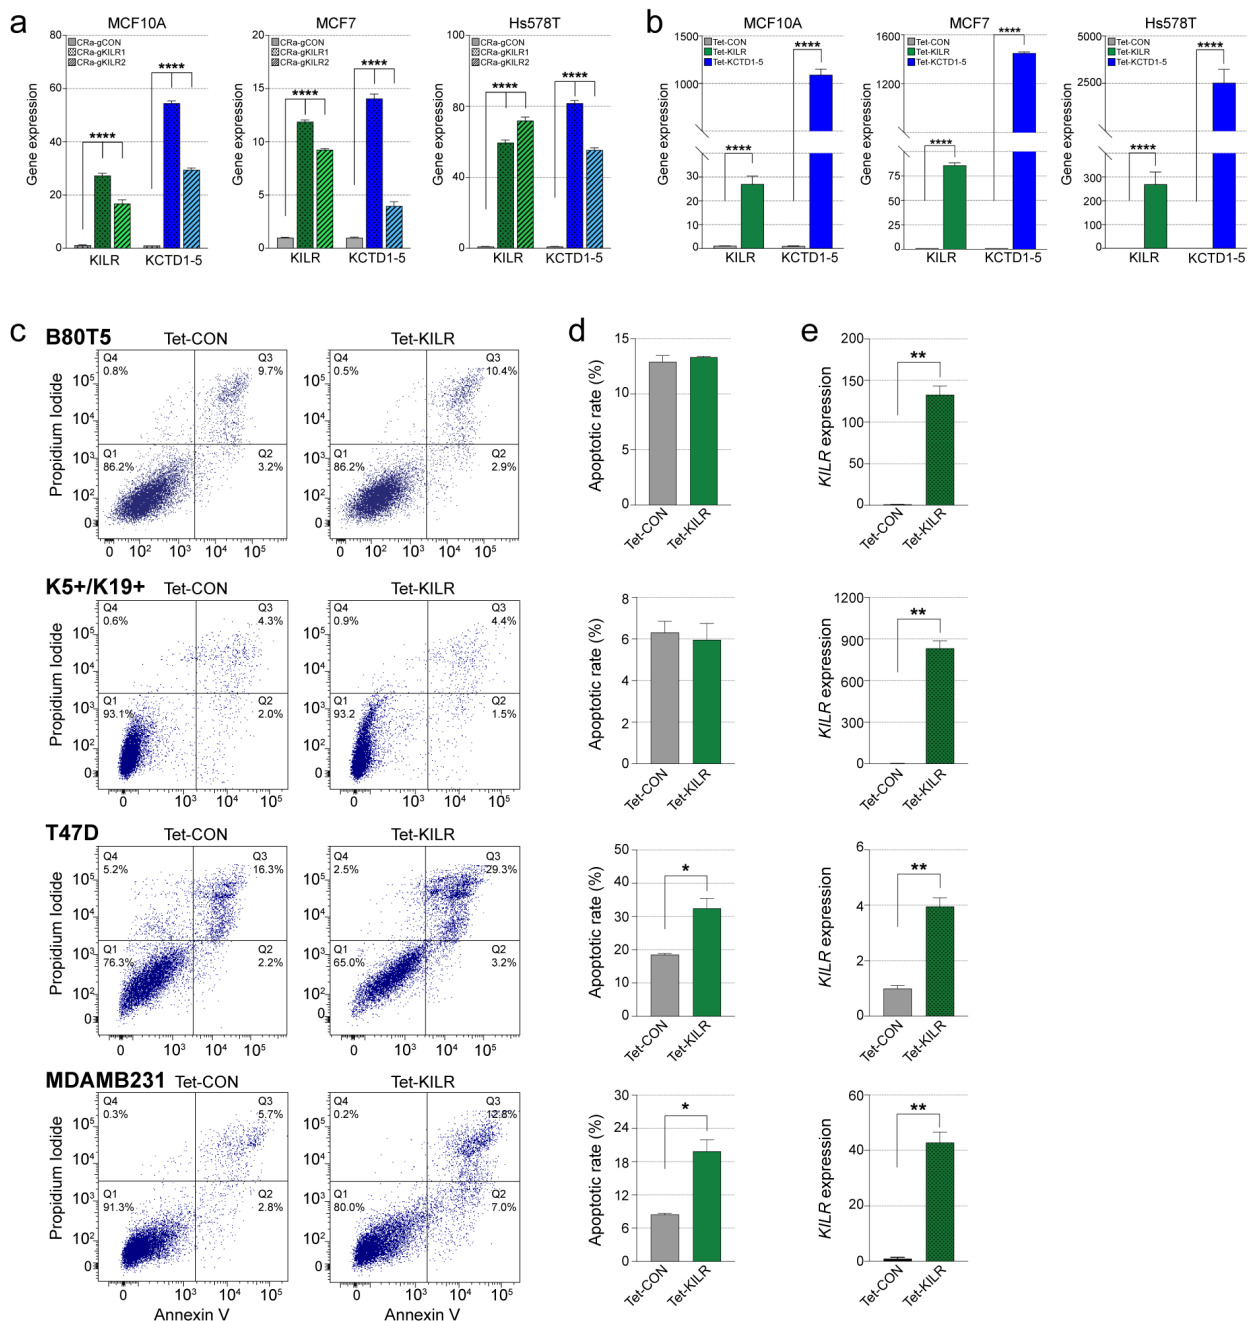

**Supplementary Figure 3. KILR overexpression induces apoptosis of breast cancer cells.** (a) qPCR for *KILR* or *KCTD1-5* expression in breast cells after CRISPRa activation of the *KCTD1-5* promoter to overexpress *KILR* with two independent gRNAs (Cra-gKILR1-2). The Cra-gCON contains a non-targeting control. Error bars, SEM (n = 3). p values were determined by two-way ANOVA followed by Dunnett's multiple comparisons test (\*\*\*\*p < 0.0001). (b) qPCR for *KILR* or *KCTD1-5* expression in breast cells after doxycycline induction of ectopic *KCTD1-5* or *KILR* expression. The Tet-CON represents an empty vector control. Error bars, SEM (n = 3). p values were determined by two-way ANOVA followed by Dunnett's multiple comparisons test (\*\*\*\*p < 0.0001). (c) Representative apoptosis analysis of breast cells after doxycycline induction of ectopic *KILR* expression by double staining with annexin V and PI. The Tet-CON represents an empty vector control. The quadrants Q were defined as Q1 = live (Annexin V- and PI-negative), Q2 = early stage of apoptosis (Annexin V-positive/PI-negative), Q3 = late stage of apoptosis (Annexin V- and PI-positive) and Q4 = necrosis (Annexin V-negative/PI-positive). (d) The percentage of cells in early- and late-stage apoptosis in each group (Q2 + Q3). Error bars, SEM (n = 3). p values were determined by Student's *t*-test (\*p < 0.05). (e) qPCR for *KILR* expression in cells after doxycycline induction of ectopic *KILR* expression. The Tet-CON represents an empty vector control. Error bars, SEM (n = 3). p values were determined by a Student's *t*-test (\*\*P < 0.01).

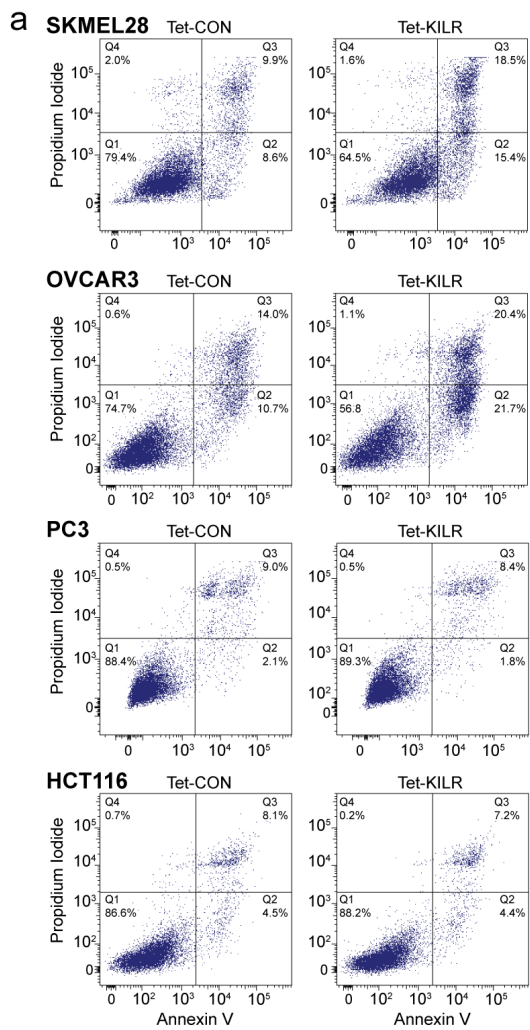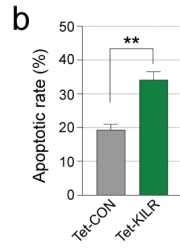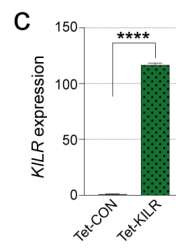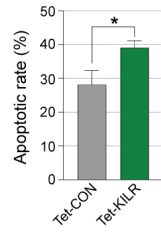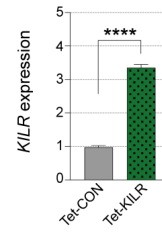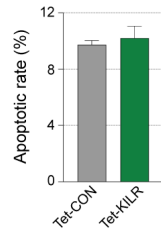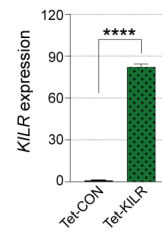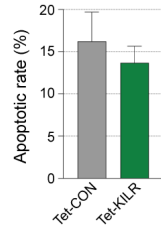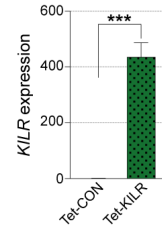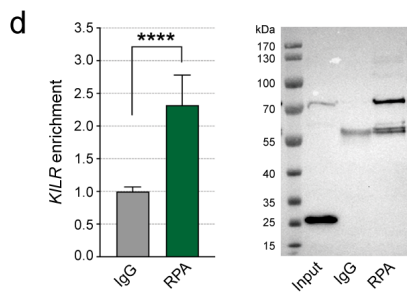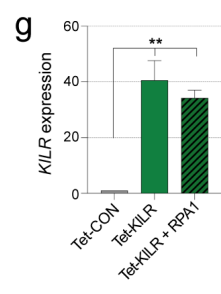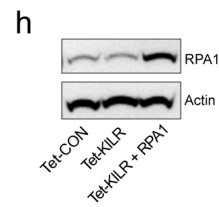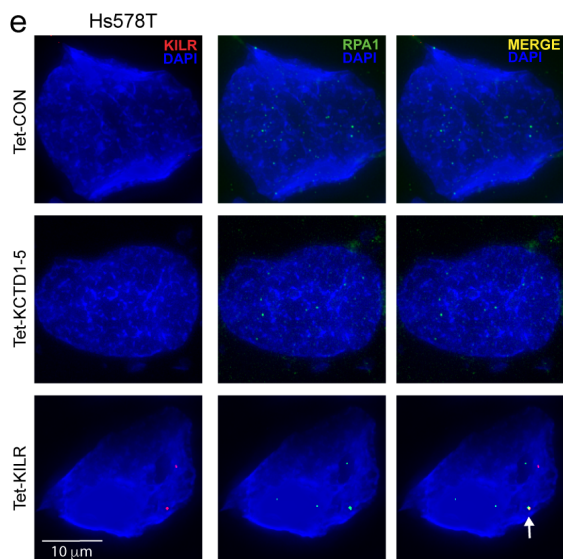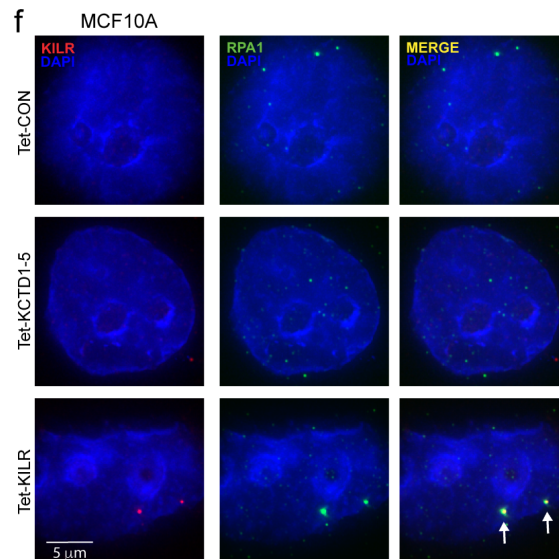

**Supplementary Figure 4.** *KILR* overexpression induces apoptosis of non-breast cancer cells through sequestration the RPA1 protein. **(a)** Representative apoptosis analysis of skin (SKMEL28), ovarian (OVCAR3), prostate (PC3) and colorectal (HCT116) cancer cells after doxycycline induction of ectopic *KILR* expression by double staining with annexin V and PI. The Tet-CON represents an empty vector control. The quadrants Q were defined as Q1 = live (Annexin V- and PI-negative), Q2 = early stage of apoptosis (Annexin V-positive/PI-negative), Q3 = late stage of apoptosis (Annexin V- and PI-positive) and Q4 = necrosis (Annexin V-negative/PI-positive). **(b)** The percentage of cells in early- and late-stage apoptosis in each group (Q2 + Q3). Error bars, SEM (n = 3). p values were determined by Student's *t*-test (\*p < 0.05, \*\*p < 0.01). **(c)** qPCR for *KILR* expression in cells after doxycycline induction of ectopic *KILR* expression. The Tet-CON represents an empty vector control. Error bars, SEM (n = 3). p values were determined by a Student's *t*-test (\*\*\*P < 0.001, \*\*\*\*p < 0.0001). **(d)** RIP for the binding of *KILR* to RPA1 from MCF7 cells. Left panel: Copurified RNA from RPA1 IPs assayed for *KILR* enrichment by qPCR. Error bars, SEM (n = 3). p values were determined by a Student's *t*-test (\*\*\*\*p < 0.0001). Right panel: IP specificity was controlled by RPA1 Western blotting. The red arrowhead denotes full-length RPA1. **(e, f)** Representative confocal microscopy images of *KILR* and RPA1 in Hs578T **(e)** and MCF10A **(f)** cells after doxycycline induction of ectopic *KCTD1-5* or *KILR* expression stained with Stellaris *KILR* RNA FISH probes (red) and immunostained with anti-RPA1 (green) (n = 3). The Tet-CON represents an empty vector control. Nuclei were stained with DAPI (blue). White arrows highlight *KILR*/RPA1 co-localization. Scale bars, 5 or 10  $\mu$ m. **(g)** qPCR for *KILR* expression in MCF7 cells after doxycycline induction of ectopic *KILR* expression with or without RPA1 overexpression. The Tet-CON represents an empty vector control. Error bars, SEM (n = 3). p values were determined by one-way ANOVA followed by Dunnett's multiple comparisons test (\*\*p < 0.01). **(h)** Western blot of MCF7 cells after doxycycline induction of ectopic *KILR* expression with or without RPA1 overexpression. The Tet-CON represents an empty vector control. Actin was used as a loading control.

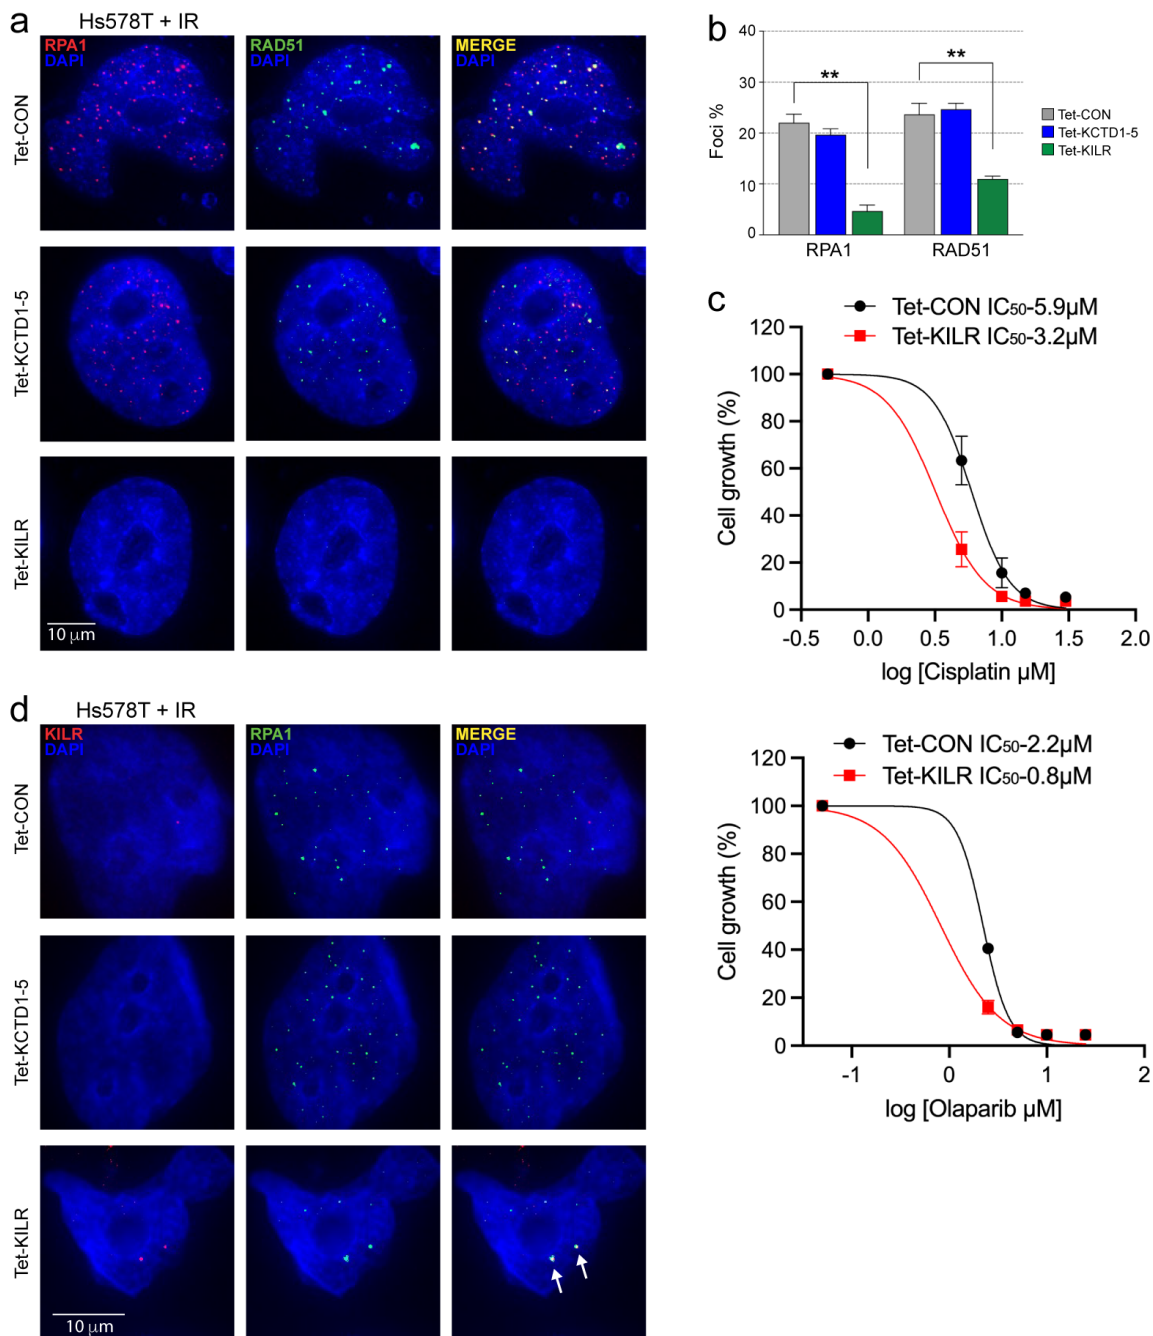

**Supplementary Figure 5.** *KILR* overexpression inhibits DNA repair and sensitizes breast cancer cells to chemotherapy. (a) Representative confocal microscopy images of RPA1 and RAD51 in Hs578T cells after doxycycline induction of ectopic *KCTD1-5* or *KILR* expression and exposure to 6-Gy IR ( $n = 3$ ). 6 h post-IR, cells were immunostained with anti-RPA1 (red) and anti-RAD51 (green). The Tet-CON represents an empty vector control. Nuclei were stained with DAPI (blue). Scale bar, 10  $\mu\text{m}$ . (b) Quantification of RPA1 or RAD51 foci in Hs578T cells. A cell with  $> 5$  distinct RPA1 or RAD51 foci in the nucleus was considered as positive. Error bars, SEM ( $n = 3$ ).  $p$  values were determined by one-way ANOVA followed by Dunnett's multiple comparisons test (\*\* $p < 0.01$ ). (c) Growth inhibition curves for MCF7 cells treated with cisplatin (top panel;  $n = 3$ ) or olaparib (bottom panel;  $n = 2$ ). (d) Representative confocal microscopy images of *KILR* and RPA1 in Hs578T cells after doxycycline induction of ectopic *KCTD1-5* or *KILR* expression and exposure to 6-Gy IR ( $n = 3$ ). 6 h post-IR, cells were stained with Stellaris *KILR* RNA FISH probes (red) and immunostained with anti-RPA1 (green). The Tet-CON represents an empty vector control. Nuclei were stained with DAPI (blue). White arrows highlight *KILR*/RPA1 co-localization. Scale bar, 10  $\mu\text{m}$ .

## Supplementary References

1. Storer, J., Hubley, R., Rosen, J., Wheeler, T.J. & Smit, A.F. The Dfam community resource of transposable element families, sequence models, and genome annotations. *Mob DNA* 12, 2 (2021).
2. Hou, M. et al. LocExpress: a web server for efficiently estimating expression of novel transcripts. *BMC Genomics* 17, 1023 (2016).
3. Ke, L., Yang, D.C., Wang, Y., Ding, Y. & Gao, G. AnnoLnc2: the one-stop portal to systematically annotate novel lncRNAs for human and mouse. *Nucleic Acids Res* 48, W230-W238 (2020).
4. Li, J. et al. TANRIC: An Interactive Open Platform to Explore the Function of lncRNAs in Cancer. *Cancer Res* 75, 3728-37 (2015).
